# Supplementary material
Source: HighWire-hosted journal article supplement (https://mbio.asm.org/content/11/1/e02880-19)

Fig S4.

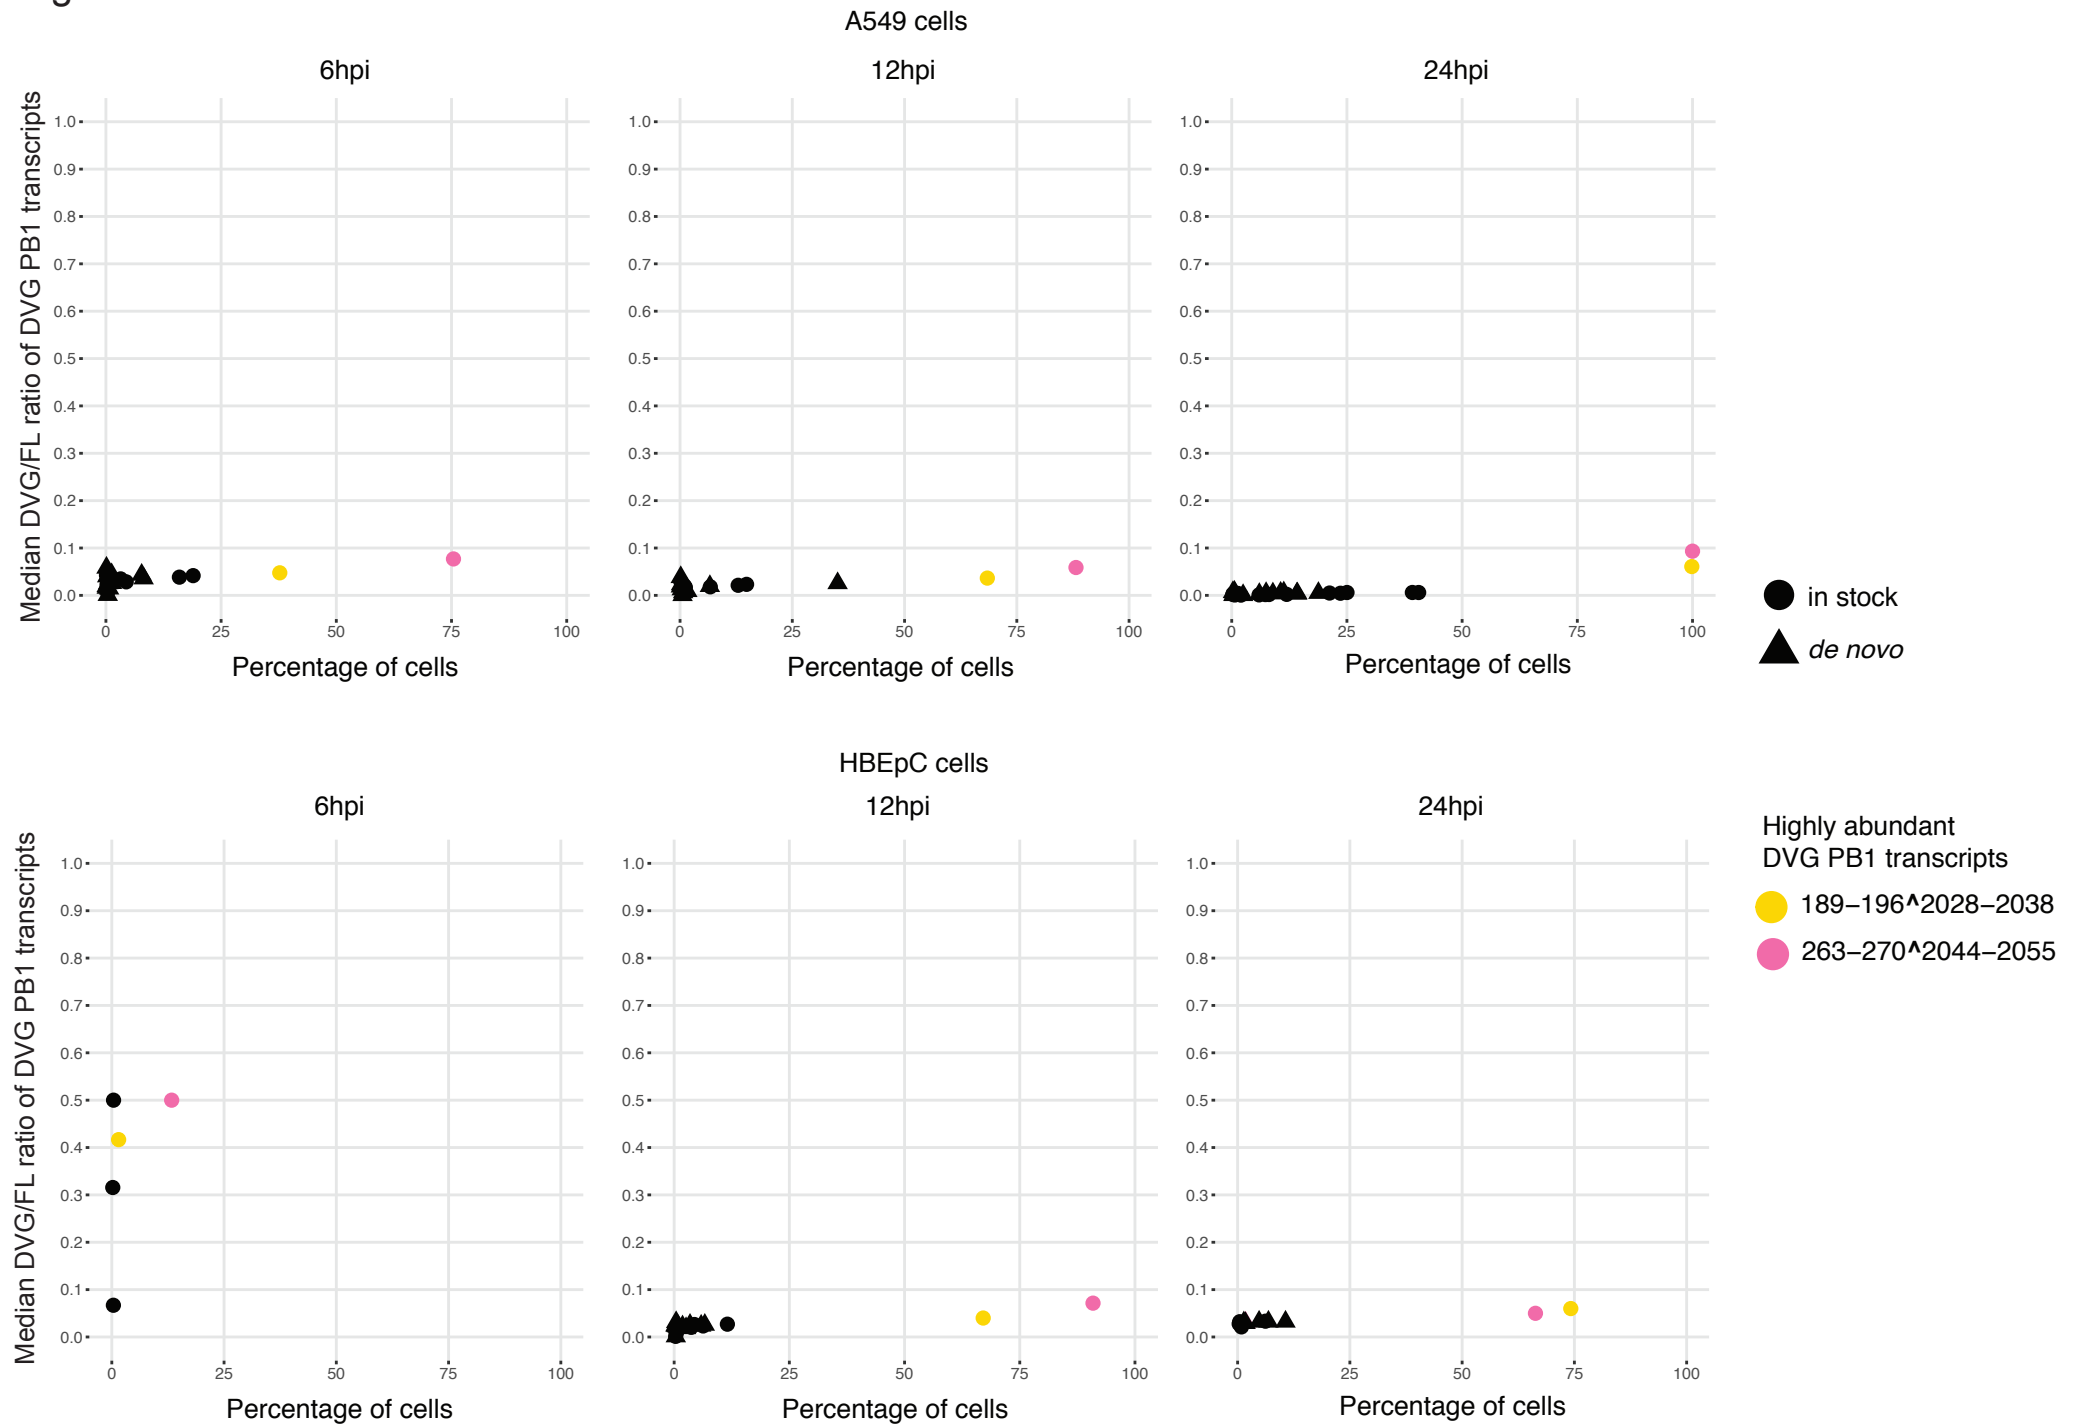

Supplement: inline-supplementary-material-4 [file inline-supplementary-material-4.pdf]
